# Supplementary material for: Molecular structure and infrared spectra of dimethyl oxalateElectronic Supplementary Information available. See http://www.rsc.org/suppdata/cp/b1/b107232n/
Source: Royal Society of Chemistry journal article supplement (doi:10.1039/b107232n), 2002-02-04
Supplement: suppdata.pdf [file suppdata.pdf]

## Supplementary Material

Table S1  
Definition of Internal Symmetry Coordinates Used in the Normal Mode Analysis of the Conformations of Dimethyl Oxalate.

| coordinate      | approximate description | symmetry        |                | definition <sup>b)</sup>                                                                                                                                                                                                                                                       |
|-----------------|-------------------------|-----------------|----------------|--------------------------------------------------------------------------------------------------------------------------------------------------------------------------------------------------------------------------------------------------------------------------------|
|                 |                         | C <sub>2h</sub> | C <sub>2</sub> |                                                                                                                                                                                                                                                                                |
| S <sub>1</sub>  | vC-C                    | A <sub>g</sub>  | A              | v <sub>2,4</sub>                                                                                                                                                                                                                                                               |
| S <sub>2</sub>  | vC=O                    | A <sub>g</sub>  | A              | v <sub>1,2</sub> + v <sub>3,4</sub>                                                                                                                                                                                                                                            |
| S <sub>3</sub>  | vC=O                    | B <sub>u</sub>  | B              | v <sub>1,2</sub> - v <sub>3,4</sub>                                                                                                                                                                                                                                            |
| S <sub>4</sub>  | vC-O                    | A <sub>g</sub>  | A              | v <sub>4,6</sub> + v <sub>2,5</sub>                                                                                                                                                                                                                                            |
| S <sub>5</sub>  | vC-O                    | B <sub>u</sub>  | B              | v <sub>4,6</sub> - v <sub>2,5</sub>                                                                                                                                                                                                                                            |
| S <sub>6</sub>  | vO-CH <sub>3</sub>      | A <sub>g</sub>  | A              | v <sub>5,7</sub> + v <sub>6,11</sub>                                                                                                                                                                                                                                           |
| S <sub>7</sub>  | vO-CH <sub>3</sub>      | B <sub>u</sub>  | B              | v <sub>5,7</sub> - v <sub>6,11</sub>                                                                                                                                                                                                                                           |
| S <sub>8</sub>  | vCH <sub>3</sub> sym    | A <sub>g</sub>  | A              | v <sub>7,10</sub> + v <sub>7,8</sub> + v <sub>7,9</sub> + v <sub>11,13</sub> + v <sub>11,12</sub> + v <sub>11,14</sub>                                                                                                                                                         |
| S <sub>9</sub>  | vCH <sub>3</sub> sym    | B <sub>u</sub>  | B              | v <sub>7,10</sub> + v <sub>7,8</sub> + v <sub>7,9</sub> - v <sub>11,13</sub> - v <sub>11,12</sub> - v <sub>11,14</sub>                                                                                                                                                         |
| S <sub>10</sub> | vCH <sub>3</sub> asym   | A <sub>g</sub>  | A              | 2v <sub>7,10</sub> - v <sub>7,8</sub> - v <sub>7,9</sub> + 2v <sub>11,13</sub> - v <sub>11,12</sub> - v <sub>11,14</sub>                                                                                                                                                       |
| S <sub>11</sub> | vCH <sub>3</sub> asym   | B <sub>u</sub>  | B              | 2v <sub>7,10</sub> - v <sub>7,8</sub> - v <sub>7,9</sub> - 2v <sub>11,13</sub> + v <sub>11,12</sub> + v <sub>11,14</sub>                                                                                                                                                       |
| S <sub>12</sub> | vCH <sub>3</sub> asym'  | A <sub>u</sub>  | A              | v <sub>7,8</sub> - v <sub>7,9</sub> + v <sub>11,12</sub> - v <sub>11,14</sub>                                                                                                                                                                                                  |
| S <sub>13</sub> | vCH <sub>3</sub> asym'  | B <sub>g</sub>  | B              | v <sub>7,8</sub> - v <sub>7,9</sub> - v <sub>11,12</sub> + v <sub>11,14</sub>                                                                                                                                                                                                  |
| S <sub>14</sub> | δCH <sub>3</sub> sym    | A <sub>g</sub>  | A              | δ <sub>8,9,7</sub> + δ <sub>9,10,7</sub> + δ <sub>8,10,7</sub> - δ <sub>8,5,7</sub> - δ <sub>9,5,7</sub> - δ <sub>10,5,7</sub> + δ <sub>12,14,11</sub><br>+ δ <sub>12,13,11</sub> + δ <sub>13,14,11</sub> - δ <sub>12,6,11</sub> - δ <sub>13,6,11</sub> - δ <sub>14,6,11</sub> |
| S <sub>15</sub> | δCH <sub>3</sub> sym    | B <sub>u</sub>  | B              | δ <sub>8,9,7</sub> + δ <sub>9,10,7</sub> + δ <sub>8,10,7</sub> - δ <sub>8,5,7</sub> - δ <sub>9,5,7</sub> - δ <sub>10,5,7</sub> - δ <sub>12,14,11</sub><br>- δ <sub>12,13,11</sub> - δ <sub>13,14,11</sub> + δ <sub>12,6,11</sub> + δ <sub>13,6,11</sub> + δ <sub>14,6,11</sub> |
| S <sub>16</sub> | δCH <sub>3</sub> asym   | A <sub>g</sub>  | A              | 2δ <sub>8,9,7</sub> - δ <sub>9,10,7</sub> - δ <sub>8,10,7</sub> + 2δ <sub>12,14,11</sub> - δ <sub>12,13,11</sub> - δ <sub>13,14,11</sub>                                                                                                                                       |
| S <sub>17</sub> | δCH <sub>3</sub> asym   | B <sub>u</sub>  | B              | 2δ <sub>8,9,7</sub> - δ <sub>9,10,7</sub> - δ <sub>8,10,7</sub> - 2δ <sub>12,14,11</sub> + δ <sub>12,13,11</sub> + δ <sub>13,14,11</sub>                                                                                                                                       |
| S <sub>18</sub> | δCH <sub>3</sub> asym'  | B <sub>g</sub>  | B              | δ <sub>9,10,7</sub> - δ <sub>8,10,7</sub> + δ <sub>12,13,11</sub> - δ <sub>13,14,11</sub>                                                                                                                                                                                      |
| S <sub>19</sub> | δCH <sub>3</sub> asym'  | A <sub>u</sub>  | A              | δ <sub>9,10,7</sub> - δ <sub>8,10,7</sub> - δ <sub>12,13,11</sub> + δ <sub>13,14,11</sub>                                                                                                                                                                                      |
| S <sub>20</sub> | γCH <sub>3</sub>        | A <sub>g</sub>  | A              | 2δ <sub>10,5,7</sub> - δ <sub>9,5,7</sub> - δ <sub>8,5,7</sub> + 2δ <sub>13,6,11</sub> - δ <sub>12,6,11</sub> - δ <sub>14,6,11</sub>                                                                                                                                           |
| S <sub>21</sub> | γCH <sub>3</sub>        | B <sub>u</sub>  | B              | 2δ <sub>10,5,7</sub> - δ <sub>9,5,7</sub> - δ <sub>8,5,7</sub> - 2δ <sub>13,6,11</sub> + δ <sub>12,6,11</sub> + δ <sub>14,6,11</sub>                                                                                                                                           |
| S <sub>22</sub> | γCH <sub>3</sub> '      | B <sub>g</sub>  | B              | δ <sub>9,5,7</sub> - δ <sub>8,5,7</sub> + δ <sub>12,6,11</sub> - δ <sub>14,6,11</sub>                                                                                                                                                                                          |
| S <sub>23</sub> | γCH <sub>3</sub> '      | A <sub>u</sub>  | A              | δ <sub>9,5,7</sub> - δ <sub>8,5,7</sub> - δ <sub>12,6,11</sub> + δ <sub>14,6,11</sub>                                                                                                                                                                                          |
| S <sub>24</sub> | τCH <sub>3</sub>        | B <sub>g</sub>  | B              | τ <sub>10,7,5,2</sub> + τ <sub>9,7,5,2</sub> + τ <sub>8,7,5,2</sub> - τ <sub>13,11,6,4</sub> - τ <sub>14,11,6,4</sub> - τ <sub>12,11,6,4</sub>                                                                                                                                 |
| S <sub>25</sub> | τCH <sub>3</sub>        | A <sub>u</sub>  | A              | τ <sub>10,7,5,2</sub> + τ <sub>9,7,5,2</sub> + τ <sub>8,7,5,2</sub> + τ <sub>13,11,6,4</sub> + τ <sub>14,11,6,4</sub> +<br>τ <sub>12,11,6,4</sub>                                                                                                                              |
| S <sub>26</sub> | δCCO                    | A <sub>g</sub>  | A              | δ <sub>2,6,4</sub> + δ <sub>4,5,2</sub>                                                                                                                                                                                                                                        |
| S <sub>27</sub> | δCCO                    | B <sub>u</sub>  | B              | δ <sub>2,6,4</sub> - δ <sub>4,5,2</sub>                                                                                                                                                                                                                                        |
| S <sub>28</sub> | δCC=O                   | A <sub>g</sub>  | A              | δ <sub>1,4,2</sub> + δ <sub>3,2,4</sub>                                                                                                                                                                                                                                        |
| S <sub>29</sub> | δCC=O                   | B <sub>u</sub>  | B              | δ <sub>1,4,2</sub> - δ <sub>3,2,4</sub>                                                                                                                                                                                                                                        |
| S <sub>30</sub> | δCOC                    | A <sub>g</sub>  | A              | δ <sub>4,11,6</sub> + δ <sub>2,7,5</sub>                                                                                                                                                                                                                                       |
| S <sub>31</sub> | δCOC                    | B <sub>u</sub>  | B              | δ <sub>4,11,6</sub> - δ <sub>2,7,5</sub>                                                                                                                                                                                                                                       |
| S <sub>32</sub> | τC-O                    | A <sub>u</sub>  | A              | τ <sub>7,5,2,4</sub> + τ <sub>11,6,4,2</sub>                                                                                                                                                                                                                                   |
| S <sub>33</sub> | τC-O                    | B <sub>g</sub>  | B              | τ <sub>7,5,2,4</sub> - τ <sub>11,6,4,2</sub>                                                                                                                                                                                                                                   |
| S <sub>34</sub> | τC-C                    | A <sub>u</sub>  | A              | τ <sub>1,2,4,3</sub> + τ <sub>1,2,4,6</sub> + τ <sub>5,2,4,6</sub> + τ <sub>5,2,4,3</sub>                                                                                                                                                                                      |
| S <sub>35</sub> | γC=O                    | A <sub>u</sub>  | A              | τ <sub>1,2,4,5</sub> + τ <sub>3,4,2,6</sub>                                                                                                                                                                                                                                    |
| S <sub>36</sub> | γC=O                    | B <sub>g</sub>  | B              | τ <sub>1,2,4,5</sub> - τ <sub>3,4,2,6</sub>                                                                                                                                                                                                                                    |

a) v - stretching; δ - bending; γ - rocking; τ - torsion.

b)  $v_{i,j}$  is the distance between atoms  $A_i$  and  $A_j$ ;  $\delta_{i,k,j}$  is the angle between vectors  $A_iA_j$  and  $A_jA_k$ ;  $\tau_{i,j,k,l}$  is the dihedral angle between the plane defined by  $A_i, A_j, A_k$  and the plane defined by  $A_j, A_k, A_l$  atoms (see Scheme 1 for atom numbering).

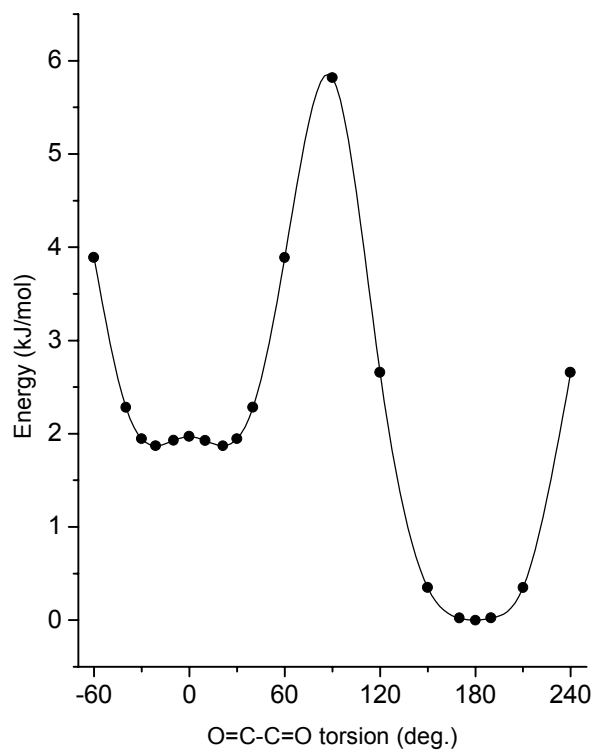

Fig. S1. Electronic energy of DMO calculated at MP2/6-31G\*\* level as a function of O=C-C=O torsion.

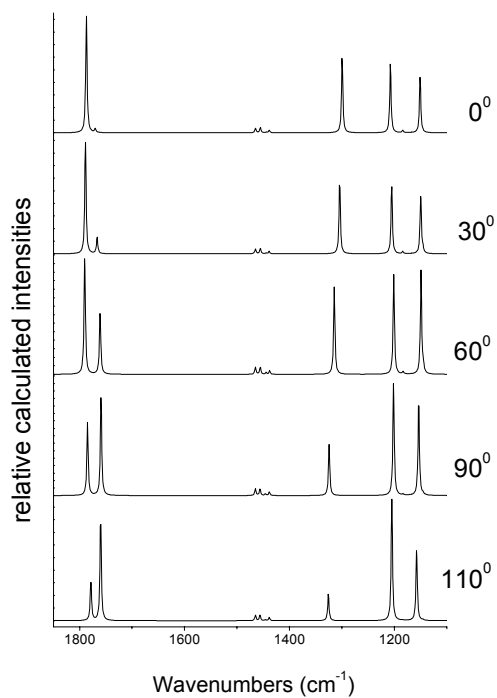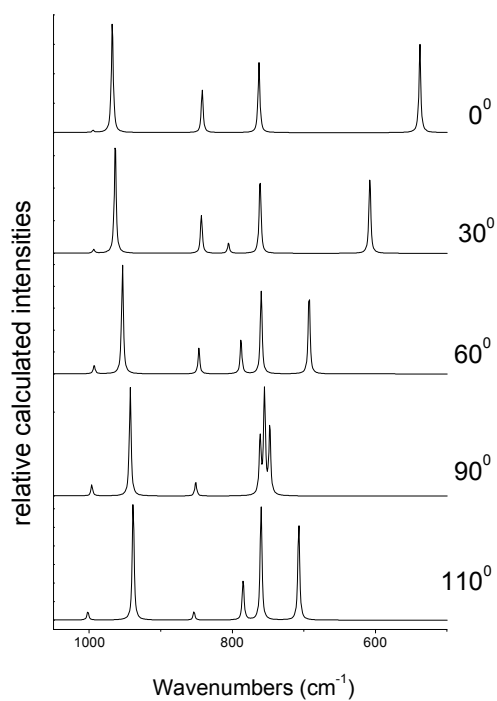

Fig. S2. Theoretical (DFT(B3LYP)/6-31++G\*\*) spectra of a series of conformations of DMO corresponding to O=C-C=O torsional angles 110 – 0°. The calculated frequencies were scaled down by a factor 0.978.
